# Supplementary material
Source: Springer Nature journal article supplement (https://www.springermedizin.de/resource/supplementary/12984_2006_113_MOESM6_ESM.pdf/9605332)
Supplement: MOESM6 [file 9605332]

**Table 4 Correlation coefficient (Pearson) between CRratio and differences in the scores of questionnaire**

| <b>CRratio</b> | <b>correlation coefficient</b> | <b>level of significance</b> |
|----------------|--------------------------------|------------------------------|
| <b>movie A</b> | <b>0.059</b>                   | <b>0.799</b>                 |
| <b>movie D</b> | <b>-0.567**</b>                | <b>0.007</b>                 |
| <b>movie R</b> | <b>-0.590**</b>                | <b>0.005</b>                 |
